# Supplementary material for: A Pilot Study Evaluating LV Diastolic Function with M-Mode Measurement of Mitral Valve Movement in the Parasternal Long Axis View
Source: MDPI journal article supplement (doi:10.3390/diagnostics13142412), 2023-07-19
Supplement: s1 [file s1]

## Supplementary Material

**Table S1. Participants demographics**

| N = 30          | Mean $\pm$ SD, Median [IQR] |
|-----------------|-----------------------------|
| Male (%)        | 20 (66.7)                   |
| Female (%)      | 10 (33.3)                   |
| Age (year)      | 28 [26 - 30]                |
| Body mass index | 22.7 $\pm$ 2.3              |
| Height (cm)     | 169.7 $\pm$ 6.9             |
| Weight (kg)     | 65.7 $\pm$ 10.3             |
| SBP (mmHg)      | 124.0 $\pm$ 9.4             |
| DBP (mmHg)      | 78.2 $\pm$ 8.5              |
| HR (/min)       | 82.0 $\pm$ 13.2             |

Continuous variables with normal distribution are presented as mean  $\pm$  standard deviation (SD). Continuous variables with non-normal distribution are presented as median [IQR, interquartile range]
